# Supplementary material for: The Impact of a Family-Based Assessment and Intervention Healthy Lifestyle Programme on Health Knowledge and Beliefs of Children with Obesity and Their Families
Source: MDPI journal article supplement (doi:10.3390/nu14204363), 2022-10-18
Supplement: s1 [file s1]

## Supplementary File S1. Questions from Whānau Pakari RCT assessment

### Knowledge and beliefs about nutrition<sup>a</sup>

|                                              | Healthy | Unhealthy | Neither | Don't know |
|----------------------------------------------|---------|-----------|---------|------------|
| Plain water is:                              |         |           |         |            |
| All fruit/veges frozen/fresh and canned are: |         |           |         |            |
| Fizzy drinks are:                            |         |           |         |            |
| Plain milk is:                               |         |           |         |            |
| Flavoured milk is:                           |         |           |         |            |
| Takeaways/fast foods are:                    |         |           |         |            |
| Crisps/chips are:                            |         |           |         |            |
| Sweets/lollies are:                          |         |           |         |            |
| Snack bars are:                              |         |           |         |            |

### What are the benefits of healthy eating?<sup>a</sup>

|  |
|--|
|  |
|--|

### Knowledge about healthy lifestyles questionnaire<sup>a</sup>

1) What is the amount of physical activity you need to do to stay healthy (minutes per day)?

|  |
|--|
|  |
|  |

2) What are the benefits of physical activity?

|  |
|--|
|  |
|  |

a. Questions are modified from: Clinical Trials Research Unit; Synovate. A National Survey of Children and Young People's Physical Activity and Dietary Behaviours in New Zealand: 2008/09 - Key Findings. 2010.

**Supplementary Table S1. Demographic characteristics of Whānau Pakari participants included in analyses of health knowledge over time (food knowledge items) by intervention group.**

|                                          |                             | BASELINE       |               | 12 MONTHS      |               | 24 MONTHS      |               | 60 MONTHS      |               |
|------------------------------------------|-----------------------------|----------------|---------------|----------------|---------------|----------------|---------------|----------------|---------------|
|                                          |                             | High-intensity | Low-intensity | High-intensity | Low-intensity | High-intensity | Low-intensity | High-intensity | Low-intensity |
| <b>n (%)</b> <sup>a</sup>                |                             | 81 (81%)       | 78            | 67 (67%)       | 67            | 68             | 53            | 47             | 41            |
| <b>Age (years) M(SD)</b>                 |                             | 10.7 (3.1)     | 10.3 (3.2)    | 11.8 (3.0)     | 11.3 (3.1)    | 12.7 (2.9)     | 12.0 (3.2)    | 15.4 (3.1)     |               |
| <b>Sex</b>                               | <b>Female</b>               | 39 (48.1%)     | 47 (60.3%)    | 33 (49.3%)     | 39 (58.2%)    | 34 (50.0%)     | 26 (49.1%)    | 21 (44.7%)     | 27 (65.9%)    |
| <b>Ethnicity</b> <sup>b</sup>            | <b>New Zealand European</b> | 34 (42.0%)     | 36 (46.2%)    | 27 (40.3%)     | 32 (47.8%)    | 27 (39.7%)     | 26 (49.1%)    | 20 (42.6%)     | 20 (48.8%)    |
|                                          | <b>Māori</b>                | 38 (46.9%)     | 35 (44.9%)    | 31 (46.3%)     | 28 (41.8%)    | 33 (48.5%)     | 22 (41.5%)    | 23 (48.9%)     | 18 (43.9%)    |
|                                          | <b>Asian</b>                | 5 (6.2%)       | 1 (1.3%)      | 5 (7.5%)       | 1 (1.5%)      | 5 (7.4%)       | 1 (1.9%)      | 2 (4.3%)       | ≡             |
|                                          | <b>European</b>             | 2 (2.5%)       | 2 (2.6%)      | 2 (3.0%)       | 2 (3.0%)      | 2 (2.9%)       | 2 (3.8%)      | 2 (4.3%)       | 2 (4.9%)      |
|                                          | <b>Pacific Islander</b>     | 2 (2.5%)       | 2 (2.6%)      | 2 (3%)         | 2 (3.0%)      | 1 (1.5%)       | -             | -              | -             |
|                                          | <b>Other</b>                | -              | 2 (2.6%)      | -              | 2 (3.0%)      | -              | 2 (3.8%)      | -              | 1 (2.4%)      |
| <b>Deprivation quintile</b> <sup>c</sup> | <b>1 (least deprived)</b>   | 13 (16.0%)     | 5 (6.4%)      | 12 (17.9%)     | 5 (7.5%)      | 12 (17.6%)     | 1 (1.9%)      | 7 (14.9%)      | 1 (2.4%)      |
|                                          | <b>2</b>                    | 15 (18.5%)     | 9 (11.5%)     | 12 (17.9%)     | 9 (13.4%)     | 12 (17.6%)     | 9 (17.0%)     | 8 (17.0%)      | 6 (14.6%)     |
|                                          | <b>3</b>                    | 15 (18.5%)     | 18 (23.1%)    | 14 (20.9%)     | 14 (20.9%)    | 13 (19.1%)     | 15 28.3%)     | 7 (14.9%)      | 9 (22.0%)     |
|                                          | <b>4</b>                    | 15 (18.5%)     | 24 (30.8%)    | 12 (17.9%)     | 23 (34.3%)    | 13 (19.1%)     | 16 (30.2%)    | 13 (27.7%)     | 14 (34.1%)    |
|                                          | <b>5 (most deprived)</b>    | 23 (28.4%)     | 22 (28.2)     | 17 (25.4%)     | 16 (23.9%)    | 18 (26.5%)     | 12 (22.6%)    | 12 (25.5%)     | 11 (26.8%)    |

<sup>a</sup> Percentages represent the proportions of participants assessed at baseline who were re-assessed at a given follow-up.

<sup>b</sup> Prioritised ethnicity.

<sup>c</sup> Based on New Zealand Deprivation Index 2006.

**Supplementary Table S2. Demographic characteristics of Whānau Pakari participants included in analyses of physical activity knowledge over time.**

|                                          |                             | <b>Baseline (All)</b> | <b>12 months</b> | <b>24 months</b> | <b>60 months</b>  |
|------------------------------------------|-----------------------------|-----------------------|------------------|------------------|-------------------|
| <b>n (%)</b> <sup>a</sup>                |                             | 157                   | 144 (60%)        | 118 (49%)        | 72 (30%)          |
| <b>Age (years)</b>                       |                             | 10.5 [8.1, 13.0]      | 11.5 [9.3, 13.7] | 12.5 [9.9, 14.8] | 15.4 [12.4, 18.3] |
| <b>Sex</b>                               | <b>Female</b>               | 83 (53%)              | 74 (51%)         | 63 (53%)         | 38 (53%)          |
| <b>Ethnicity</b> <sup>b</sup>            | <b>New Zealand European</b> | 75 (48%)              | 70 (49%)         | 56 (48%)         | 31 (43%)          |
|                                          | <b>Māori</b>                | 67 (43%)              | 59 (41%)         | 49 (42%)         | 34 (47%)          |
|                                          | <b>Asian</b>                | 6 (4%)                | 6 (4.3%)         | 6 (5%)           | 2 (3%)            |
|                                          | <b>European</b>             | 4 (3%)                | 4 (3%)           | 4 (3%)           | 4 (6%)            |
|                                          | <b>Pacific Islander</b>     | 3 (2%)                | 3 (2%)           | 1 (1%)           | Nil               |
|                                          | <b>Other</b>                | 3 (1%)                | 2 (1%)           | 2 (2%)           | 1 (1%)            |
| <b>Deprivation quintile</b> <sup>c</sup> | <b>1 (least deprived)</b>   | 18 (12%)              | 18 (13%)         | 13 (11%)         | 7 (10%)           |
|                                          | <b>2</b>                    | 25 (16%)              | 24 (17%)         | 22 (19%)         | 11 (15%)          |
|                                          | <b>3</b>                    | 35 (22%)              | 33 (23%)         | 29 (25%)         | 13 (18%)          |
|                                          | <b>4</b>                    | 39 (25%)              | 35 (24%)         | 29 (25%)         | 25 (35%)          |
|                                          | <b>5 (most deprived)</b>    | 40 (26%)              | 34 (24%)         | 25 (21%)         | 16 (22%)          |

<sup>a</sup> Percentages represent the proportions of participants assessed at baseline who were re-assessed at a given follow-up.

<sup>b</sup> Prioritised ethnicity.

<sup>c</sup> Based on New Zealand Deprivation Index 2006.

**Supplementary Table S3. Demographic characteristics of Whānau Pakari participants who were compared to national survey data.**

|                                          |                      | ALL (BASELINE)    | 12 MONTHS <sup>a</sup> | 24 MONTHS <sup>a</sup> |
|------------------------------------------|----------------------|-------------------|------------------------|------------------------|
| <b>5-9 years (food)</b>                  |                      |                   |                        |                        |
| <b>n (%)</b>                             |                      | 98                | 41 (%)                 | 29 (%)                 |
| <b>Age (years)</b>                       |                      | 7.6 [5.8, 9.1]    | 6.8 [5.1, 7.6]         | 6.3 [5.1, 7.1]         |
| <b>Sex</b>                               | Female               | 46 (47%)          | 19 (46%)               | 16 (55%)               |
| <b>Ethnicity <sup>a</sup></b>            | New Zealand European | 44 (45%)          | 21 (51%)               | 15 (52%)               |
|                                          | Māori                | 49 (50%)          | 19 (46%)               | 14 (48%)               |
|                                          | Asian                | 1 (1%)            | nil                    | nil                    |
|                                          | European             | 2 (2%)            | 1 (2%)                 | nil                    |
|                                          | Pacific Islander     | 2 (2%)            | nil                    | nil                    |
|                                          | Other                | nil               | nil                    | nil                    |
| <b>Deprivation quintile <sup>b</sup></b> | 1 (least deprived)   | 5 (5%)            | 2 (5%)                 | 2 (7%)                 |
|                                          | 2                    | 15 (15.3%)        | 8 (20%)                | 6 (21%)                |
|                                          | 3                    | 25 (26%)          | 14 (34%)               | 11 (38)                |
|                                          | 4                    | 22 (22%)          | 6 (15%)                | 2 (7%)                 |
|                                          | 5 (most deprived)    | 31 (32%)          | 1 (27%)                | 8 (28%)                |
| <b>10+ years (physical activity)</b>     |                      |                   |                        |                        |
| <b>n (%)</b>                             |                      | 134               | 98 (%)                 | 89 (%)                 |
| <b>Age (years)</b>                       |                      | 13.0 [11.4, 14.3] | 10.4 [10.4, 13.3]      | 11.2 [9.6, 13.2]       |
| <b>Female</b>                            |                      | 76 (57%)          | 52 (53%)               | 47 (53%)               |
| <b>Ethnicity <sup>b</sup></b>            | New Zealand European | 62 (46%)          | 45 (46%)               | 41 (46%)               |
|                                          | Māori                | 56 (42%)          | 39 (40%)               | 35 (39%)               |
|                                          | Asian                | 5 (4%)            | 6 (6%)                 | 6 (7%)                 |
|                                          | European             | 4 (3%)            | 3 (3%)                 | 4 (5%)                 |
|                                          | Pacific Islander     | 4 (3%)            | 3 (3%)                 | 1 (1%)                 |
|                                          | Other                | 3 (2%)            | 2 (2%)                 | 2 (2%)                 |
| <b>Deprivation quintile <sup>c</sup></b> | 1 (least deprived)   | 17 (13%)          | 16 (16%)               | 11 (12%)               |
|                                          | 2                    | 22 (16%)          | 15 (15%)               | 16 (18%)               |
|                                          | 3                    | 23 (17%)          | 18 (18%)               | 18 (20%)               |
|                                          | 4                    | 38 (28%)          | 28 (29%)               | 27 (30%)               |
|                                          | 5 (most deprived)    | 34 (25%)          | 21 (21%)               | 17 (19%)               |

<sup>a</sup> Percentages represent the proportions of participants assessed at baseline who were re-assessed at a given follow-up.

<sup>b</sup> Prioritised ethnicity.

<sup>c</sup> Based on New Zealand Deprivation Index 2006.

**Supplementary Table S4. Number and proportion of Whānau Pakari participants who correctly answered items in the health knowledge questionnaire at baseline and follow-up assessments, by trial randomisation group.**

|                          | High-intensity intervention |                        | Low-intensity control |           | High-intensity intervention |           | Low-intensity control |                         | High-intensity intervention |                        | Low-intensity control |                         |
|--------------------------|-----------------------------|------------------------|-----------------------|-----------|-----------------------------|-----------|-----------------------|-------------------------|-----------------------------|------------------------|-----------------------|-------------------------|
|                          | Baseline                    | 12 months              | Baseline              | 12 months | Baseline                    | 24 months | Baseline              | 24 months               | Baseline                    | 60 months              | Baseline              | 60 months               |
| <b>HEALTHY EATING</b>    |                             |                        |                       |           |                             |           |                       |                         |                             |                        |                       |                         |
| <b>n</b>                 | 68                          | 68                     | 61                    | 61        | 58                          | 58        | 48                    | 48                      | 43                          | 43                     | 38                    | 38                      |
| <b>Healthy</b>           |                             |                        |                       |           |                             |           |                       |                         |                             |                        |                       |                         |
| Plain water              | 65 (96%)                    | 65 (96%)               | 52 (85%)              | 59 (97%)  | 56 (97%)                    | 58 (100%) | 40 (85%)              | 47 (100%)* <sup>a</sup> | 40 (95%)                    | 42 (100%) <sup>b</sup> | 29 (83%)              | 35 (100%)* <sup>c</sup> |
| Plain milk               | 49 (72%)                    | 62 (91%)*              | 42 (69%)              | 49 (80%)  | 41 (71%)                    | 55 (95%)* | 35 (73%)              | 40 (83%)                | 32 (74 %)                   | 38 (88%)               | 27 (73%)              | 29 (78%)* <sup>d</sup>  |
| All fruit and vegetables | 58 (85%)                    | 67 (99%)*              | 52 (85%)              | 56 (92%)  | 49 (84%)                    | 56 (97%)* | 42 (88%)              | 45 (94%)                | 36 (84%)                    | 41 (95%)               | 32 (86%)              | 36 (97%)* <sup>d</sup>  |
| <b>Unhealthy</b>         |                             |                        |                       |           |                             |           |                       |                         |                             |                        |                       |                         |
| Flavoured milk           | 42 (62%)                    | 45 (66%)               | 36 (59%)              | 44 (72%)  | 35 (60%)                    | 42 (72%)  | 29 (60%)              | 45 (94%)*               | 27 (63%)                    | 38 (88%)*              | 24 (63%)              | 33 (87%)*               |
| Fizzy drinks             | 61 (90%)                    | 67 (99%)               | 55 (90%)              | 58 (95%)  | 52 (90%)                    | 57 (98%)  | 44 (92%)              | 48 (100%)               | 39 (91%)                    | 43 (100%)              | 35 (92%)              | 37 (97%)                |
| Takeaways and fast foods | 59 (87%)                    | 66 (97%)*              | 47 (77%)              | 57 (93%)* | 51 (88%)                    | 55 (95%)  | 38 (79%)              | 47 (98%)*               | 38 (88%)                    | 42 (98%)               | 30 (79%)              | 34 (89%)                |
| Crisps and chips         | 60 (88%)                    | 64 (94%)               | 45 (74%)              | 56 (92%)* | 52 (90%)                    | 53 (91%)  | 36 (75%)              | 45 (94%)*               | 38 (88%)                    | 42 (98%)               | 29 (76%)              | 36 (95%)*               |
| Sweets and lollies       | 65 (96%)                    | 67 (99%)               | 54 (89%)              | 59 (97%)  | 56 (97%)                    | 56 (97%)  | 43 (90%)              | 48 (100%)               | 42 (98%)                    | 43 (100%)              | 36 (95%)              | 38 (100%)               |
| Snack bars               | 23 (34%)                    | 40 (59%)*              | 27 (44%)              | 22 (36%)  | 19 (33%)                    | 34 (59%)* | 24 (50%)              | 31 (65%)                | 15 (35%)                    | 27 (63%)*              | 17 (45%)              | 20 (53%)                |
| <b>PHYSICAL ACTIVITY</b> |                             |                        |                       |           |                             |           |                       |                         |                             |                        |                       |                         |
| <b>n</b>                 | 67                          | 67                     | 61                    | 61        | 57                          | 57        | 47                    | 47                      | 40                          | 40                     | 32                    | 32                      |
| <b>≥60 min/day</b>       | 20 (30%)                    | 56 (84%)* <sup>†</sup> | 24 (39%)              | 36 (59%)* | 18 (32%)                    | 46 (81%)* | 17 (36%)              | 34 (72%)*               | 10 (25%)                    | 31 (78%)* <sup>†</sup> | 12 (38%)              | 17 (53%)                |

Data are n (%), corresponding to the number and proportion of participants with correct responses at a given assessment.

Baseline data for comparison are only provided for those participants with corresponding data at a given follow-up assessment.

\*p<0.05, \*\*p<0.01, and \*\*\*p<0.001 for statistically significant within-group differences from baseline, derived from McNemar's tests.

†p<0.05 for a statistically significant difference between groups at p<0.05, based on a two-sample McNemar's tests

<sup>a</sup> n=47; <sup>b</sup> n=42; <sup>c</sup> n= 35; and <sup>d</sup> n=37.
